# Supplementary material for: Evidence and quantitation of aromatic organosulfates in ambient aerosols in Lahore, Pakistan
Source: Copernicus journal article supplement (doi:10.5194/acp-13-4865-2013), 2013-05-14
Supplement: Supplementary file 1 [file acp-13-4865-2013-supplement.pdf]

# Supplementary Material

## Evidence and quantitation of aromatic organosulfates in ambient aerosols in Lahore, Pakistan

S. Kundu<sup>1</sup>, T. A. Quraishi<sup>2</sup>, G. Yu<sup>3</sup>, C. Suarez<sup>3</sup>, F. N. Keutsch<sup>3</sup>, and E. A. Stone<sup>1,\*</sup>

<sup>1</sup>Department of Chemistry, University of Iowa, Iowa City, IA 52242, USA

<sup>2</sup>Institute of Environmental Engineering and Research, University of Engineering and  
Technology, Lahore, Pakistan

<sup>3</sup>Department of Chemistry, University of Wisconsin-Madison, Madison, Wisconsin 53706, USA

E-mail: [betsy-stone@uiowa.edu](mailto:betsy-stone@uiowa.edu)

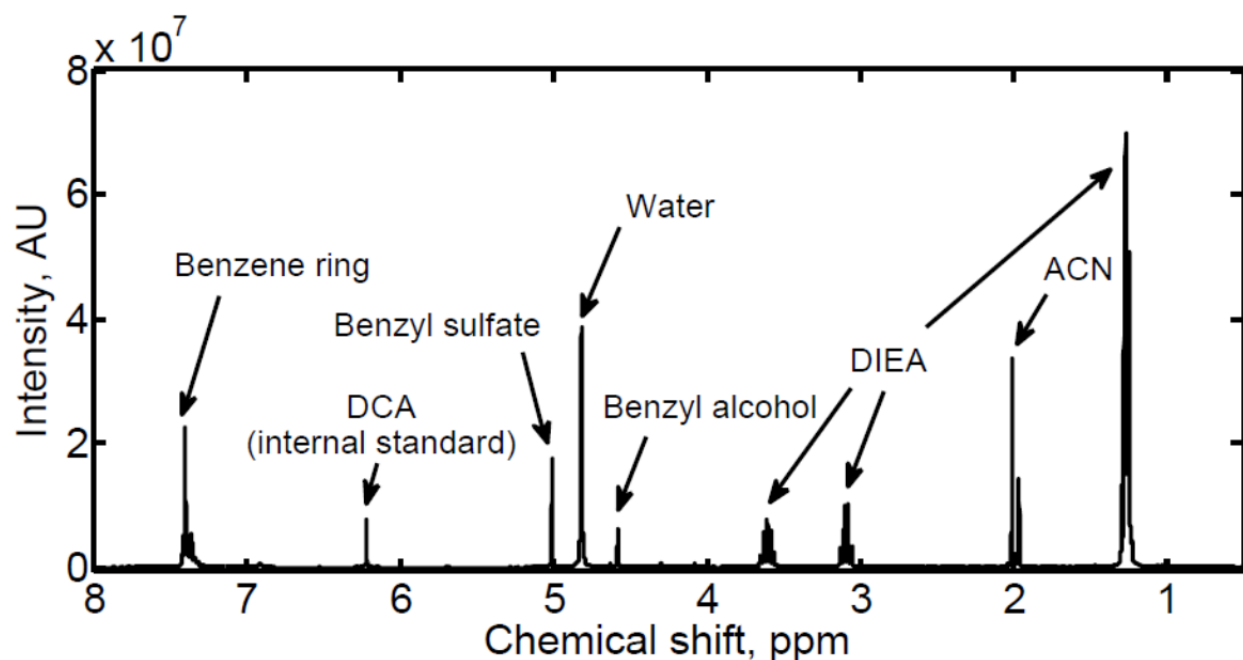

**Figure S1.**  $^1\text{H}$  NMR spectrum of synthesized benzyl sulfate acquired by a 300 MHz Varian NMR spectrometer with 16 scans, 75 s relaxation delay time, and  $45^\circ$  pulse flip angle. The product, benzyl sulfate, shows  $^1\text{H}$  chemical shift at 5.0 ppm for methylene protons and at 7.2-7.4 ppm for aromatic protons. Impurities resulting from synthesis include acetonitrile ( $\delta$  2.0 ppm), N,N-diisopropylethylamine (DIEA) ( $\delta$  1.3, 3.1, and 3.6 ppm), benzyl alcohol ( $\delta$  4.6 ppm for methylene protons and 7.2-7.4 ppm for aromatic protons), and water ( $\delta$  4.8 ppm). The benzyl sulfate concentration in the product mixture was estimated by comparing the peak area of methylene proton of benzyl sulfate with the peak area of the known amount of dichloroacetic acid (DCA) as internal standard.
